# Supplementary material for: Carboxylated Cellulose Nanocrystals Decorated with Varying Molecular Weights of Poly(diallyldimethylammonium chloride) as Sustainable Antibacterial Agents
Source: MDPI journal article supplement (doi:10.3390/polym15040865), 2023-02-09
Supplement: s1 [file s1]

## Supporting Information

# Carboxylated Cellulose Nanocrystals Decorated with Varying Molecular Weights of Poly(diallyldimethylammonium chloride) as Sustainable Antibacterial Agents

Eliskander Rabia <sup>1</sup>, Beza Tuga <sup>1</sup>, José de Ondarza <sup>2</sup>, Saleen M. Ramos <sup>1</sup>, Edmond Lam <sup>3,4</sup>, Sabahudin Hrapovic <sup>3</sup>, Yali Liu <sup>3</sup> and Rajesh Sunasee <sup>1,\*</sup>

<sup>1</sup> Department of Chemistry and Biochemistry, State University of New York at Plattsburgh, Plattsburgh, NY 12901, USA; erabi003@plattsburgh.edu (E.R.); btuga001@plattsburgh.edu (B.T.); sramo009@plattsburgh.edu (S.M.R.)

<sup>2</sup> Department of Biological Sciences, State University of New York at Plattsburgh, Plattsburgh, NY 12901, USA; deondaj@plattsburgh.edu

<sup>3</sup> Aquatic and Crop Resource Development Research Centre, National Research Council Canada, Montreal, QC H4P 2R2, Canada; edmond.lam@nrc-nrc.gc.ca (E.L.); sabahudin.hrapovic@nrc-nrc.gc.ca (S.H.); yali.liu@nrc-nrc.gc.ca (Y.L.)

<sup>4</sup> Department of Chemistry, McGill University, 801 Sherbrooke St. West, Montreal, QC H3A 0B8, Canada

\* Correspondence: rajesh.sunasee@plattsburgh.edu; Tel.: +1-518-564-2703

**Table S1.** Apparent particle size (DLS), polydispersity index and zeta potential of cCNCs and cCNCs-PDDA samples.

| Sample                     | Apparent Particle Size (nm) | Polydispersity Index (PDI) | Zeta Potential (mV) |
|----------------------------|-----------------------------|----------------------------|---------------------|
| cCNCs                      | 97.4 ± 0.4                  | 0.21                       | -35.1 ± 1.2         |
| cCNCs-PDDA-8500            | 125.6 ± 2.2                 | 0.18                       | +31.2 ± 0.8         |
| cCNCs-PDDA-240,000         | 175.2 ± 0.9                 | 0.27                       | +48.0 ± 1.4         |
| cCNCs-PDDA-400,000–500,000 | 207.9 ± 0.6                 | 0.26                       | +61.8 ± 0.1         |

**Table S2.** Dimensions (average length and width) of cCNCs-PDDA samples from TEM images.

| Sample                     | Length (nm)  | Width (nm)  | # of Particles |
|----------------------------|--------------|-------------|----------------|
| cCNCs-PDDA-8500            | 133.1 ± 37.5 | 5.26 ± 1.03 | 218            |
| cCNCs-PDDA-240,000         | 145.3 ± 39.1 | 5.09 ± 1.23 | 240            |
| cCNCs-PDDA-400,000–500,000 | 133.7 ± 37.1 | 5.72 ± 1.79 | 240            |

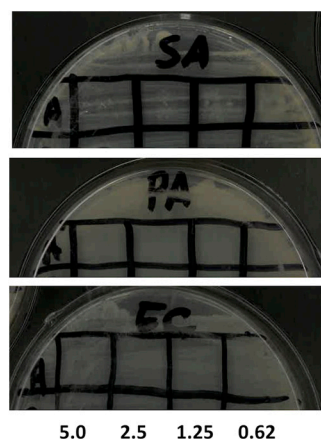

**Figure S1.** Bacterial lawn growth inhibition assay of pristine cCNCs (Sample A) at dilutions of 5.0, 2.5, 1.25 and 0.62 mg/mL on TSA plates inoculated with SA, EC and PA.

## S2. Antibacterial test

**MIC method:** 24 h broth cultures of SA, EC and PA in Tryptic Soy Broth (TSB; Hardy Diagnostics, Santa Maria, CA) were grown at 30 °C and diluted to an absorbance of 0.1 (600 nm) in TSB, except that a 0.2 ABS<sub>600</sub> culture was used for the initial cCNCs dilution step (2.5 mg/mL). 100 µL aliquot of each culture was pipetted into wells of sterile 96 well assay plates. 100 µL of each cCNCs stock solution (5 mg/mL) was added to the first well containing bacterial culture (0.2 ABS<sub>600</sub>) and mixed by repeated pipetting (final concentration = 2.5 mg/mL cCNCs and 0.1 A<sub>600</sub> of cells); 100 µL of this mixture was then transferred to the next well (0.1 A<sub>600</sub> culture) and mixed, and this process repeated to obtain concentrations of 2.50, 1.25, 0.63, 0.31, 0.16 and 0.08 mg/mL of the cCNC materials. Wells were incubated for 24 h at 35° C and evaluated for growth (turbidity) and survival (streaking 5 µL of each well onto agar plates).

**Results:** Serial dilution of different cCNCs solutions attained concentrations of 2.5–0.08 mg/mL in culture containing ~10<sup>7</sup> cells/mL. Dilutions of 2.5 and 1.25 mg/mL exhibited turbidity due to cCNCs. Following incubation at 30 °C for 24 h, cloudiness of each well due to bacterial growth was assessed. Absence of cloudiness indicated growth inhibition.

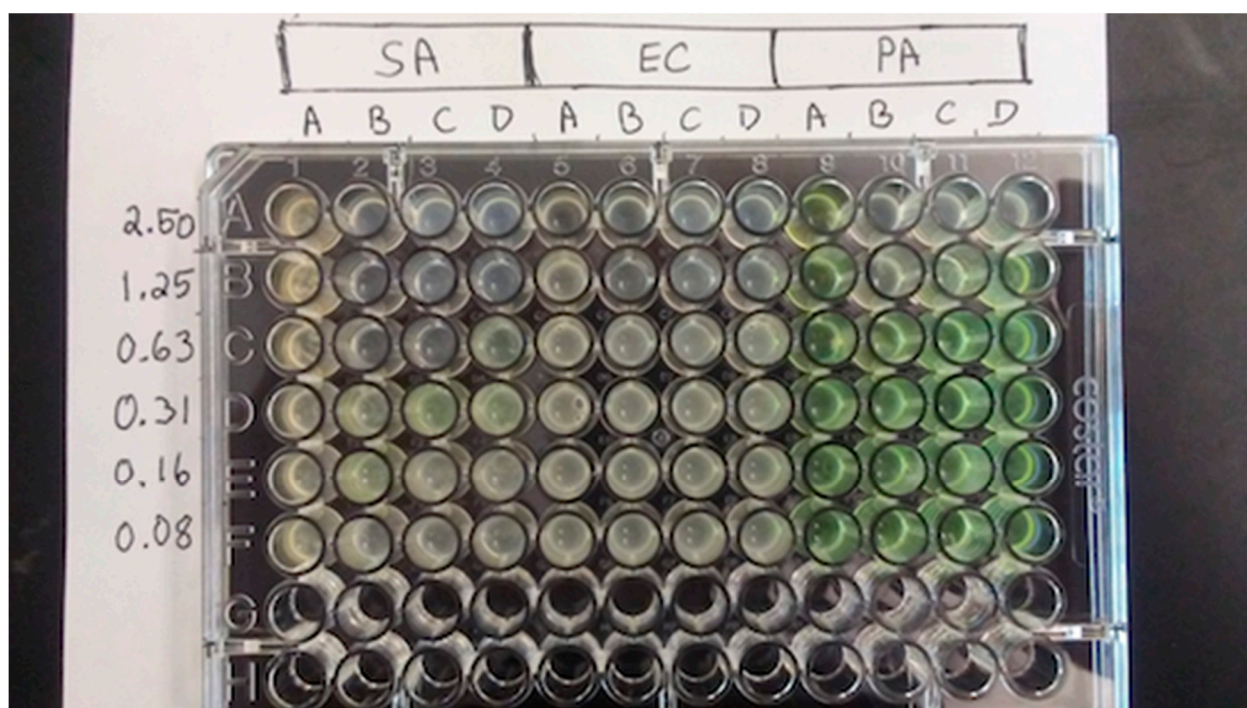

**Figure S2.** Broth dilution assay with (A) cCNCs, (B) cCNCs-PDDA-8500, (C) cCNCs-PDDA-240,000, and (D) cCNCs-PDDA-400,000–500,000 against the bacterial species (SA, EC, PA) at varying concentrations.

**Table S3.** MIC values of free PDDA as positive control from bacterial lawn inhibition assays.

| Bacteria             | PDDA-8500   | PDDA-400–500k |
|----------------------|-------------|---------------|
| <i>E. coli</i>       | 0.625 mg/mL | 0.078 mg/mL   |
| <i>S. aureus</i>     | 1.25 mg/mL  | 0.156 mg/mL   |
| <i>P. aeruginosa</i> | none        | 2.5 mg/mL     |

**Disclaimer/Publisher's Note:** The statements, opinions and data contained in all publications are solely those of the individual author(s) and contributor(s) and not of MDPI and/or the editor(s). MDPI and/or the editor(s) disclaim responsibility for any injury to people or property resulting from any ideas, methods, instructions or products referred to in the content.
